# Supplementary material for: Quantum-dots-based phase separation into a 3D/0D perovskite heterojunction for boosting X-ray detector performance
Source: Royal Society of Chemistry journal article supplement (doi:10.1039/d5nr03731j), 2025-01-01
Supplement: d5nr03731j1.pdf [file d5nr03731j1.pdf]

## Quantum-Dots-Based Phase Separation into a 3D/0D Perovskite Heterojunction for Boosting X-Ray Detector Performance

Han Li,<sup>a,b†</sup> Shanshan Yu,<sup>a,c†</sup> Handong Jin,<sup>a,b†</sup> Zikun Jin,<sup>b</sup> Wei Qian,<sup>b</sup> Wanshun Yang,<sup>b</sup> Shihe Yang<sup>ab\*</sup>

Dr. H. Li, S. Yu, H. Jin, Prof. S. Yang

Institute of Biomedical Engineering, Shenzhen Bay Laboratory, Shenzhen, Guangdong 518107, China

chsyang@pku.edu.cn

Dr. H. Li, S. Yu, H. Jin, Z. Jin, Dr. W. Qian, W. Yang, Prof. S. Yang

Guangdong Provincial Key Lab of Nano-Micro Materials Research, School of Advanced Materials, Shenzhen

Graduate School, Peking University, Shenzhen, Guangdong 518055, China.

S. Yu,

Department of Chemistry, The University of Hong Kong, Hong Kong S.A.R., China

The current distribution in the dark and light fields of the Pe-FPD was fitted to a normal distribution curve, as reported elsewhere:

$$f(x) = \frac{1}{\sqrt{2\pi}\sigma} \exp\left(-\frac{(x-\mu)^2}{2\sigma^2}\right)$$

where  $\mu$  is the average current value and  $\sigma$  is the standard deviation.

The SNR was calculated by:

$$SNR = J_s/J_n$$

where  $J_s$  is the net X-ray generated current density and  $J_n$  is the standard deviation of the photocurrent density under X-ray exposure.

The sensitivity of our device with different applied voltages can be calculated by the equation:

$$R_s = \frac{I_p - I_d}{D \times A}$$

where  $R_s$  is the sensitivity,  $I_p$  and  $I_d$  are the photocurrent and dark current, respectively, and  $D$  and  $A$  represent the irradiation dose rate and effective area of the X-ray detector, respectively

The mobility-lifetime ( $\mu\tau$ ) product was obtained by fitting the curve of photocurrent versus bias voltage dependence using the modified Hecht equation:

$$I = \frac{I_0 \mu \tau V^{1 - \exp\left(-\frac{L^2}{\mu \tau V}\right)}}{L^2 \left(1 + \frac{Ls}{V\mu}\right)}$$

where  $I_0$  is the saturated photocurrent,  $L$  is the distance between the electrodes,  $V$  is the applied bias,  $\mu$  is the carrier mobility,  $\tau$  is the lifetime, and  $s$  is the surface recombination rate.

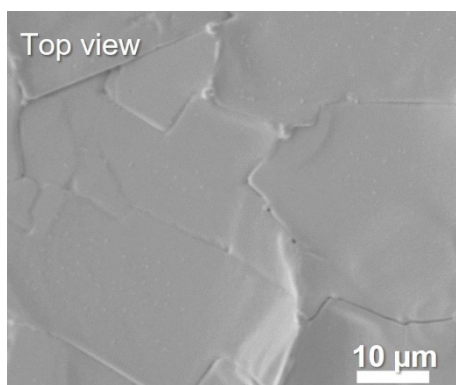

**Figure S1.** SEM image of the CsPbBr<sub>3</sub>/Cs<sub>4</sub>PbBr<sub>6</sub> film from top view.

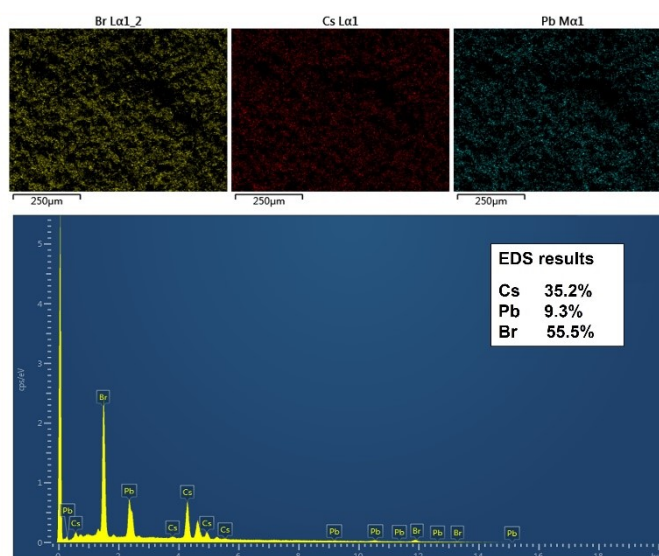

**Figure S2.** EDS mapping results of the composition Cs<sub>4</sub>PbBr<sub>6</sub>.

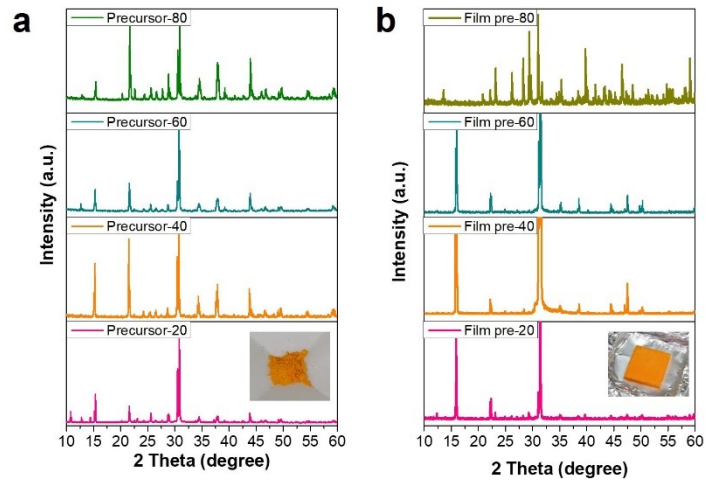

**Figure S3.** XRD patterns of the (a) precursor powders synthesized by different temperature 20/40/60/80 °C and (b) perovskite film after hot-pressing

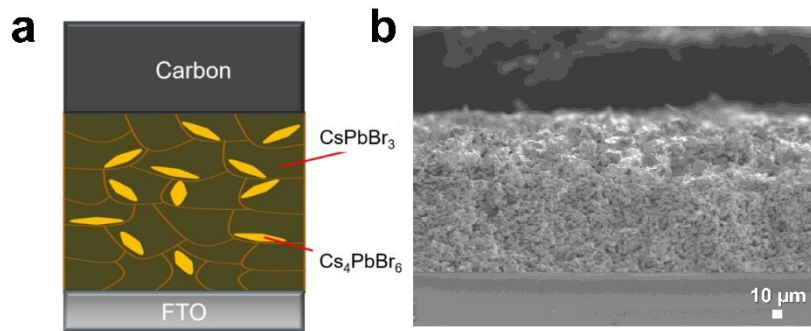

**Figure S4.** (a) Schematic device structure and (b) SEM images of CsPbBr<sub>3</sub>/Cs<sub>4</sub>PbBr<sub>6</sub> composites film rather than the layer heterojunction from cross-section view.

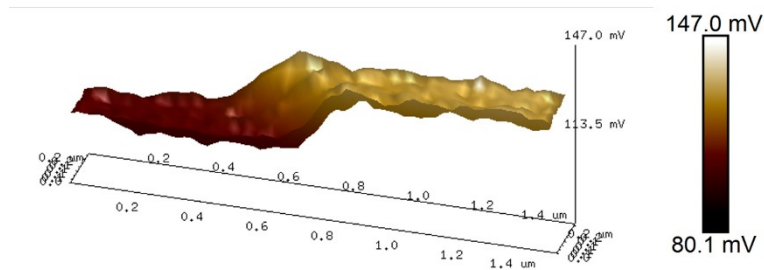

**Figure S5.** KPFM 3D maps of the heterojunction film at the interface.

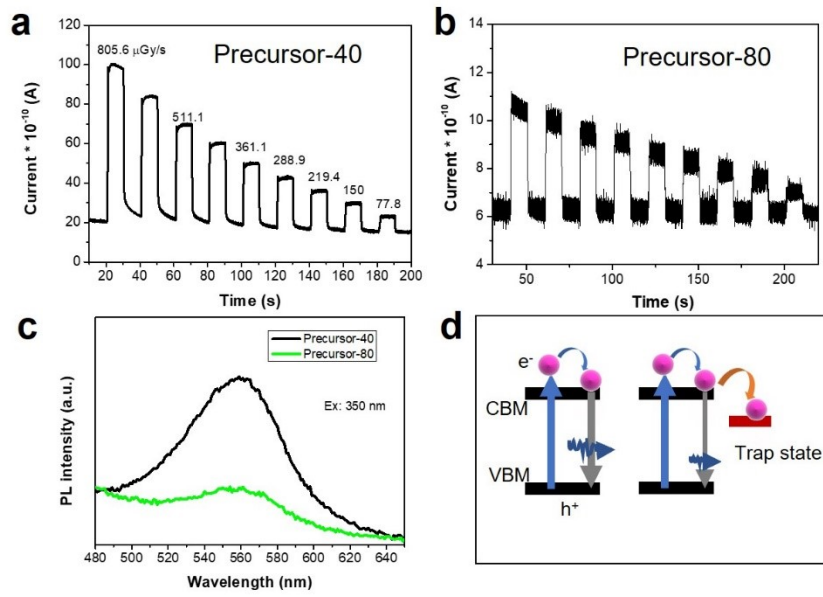

**Figure S6.** (a, b) X-ray i-t curves of the devices produced by different precursor powders. (c) PL results of the different precursors. (d) Schematic of the carriers recombination.

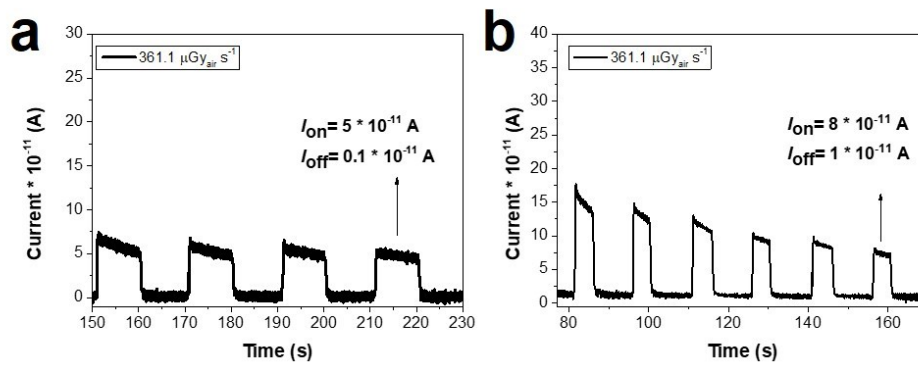

**Figure S7.** X-ray i-t curves of the CsPbBr<sub>3</sub>/Cs<sub>4</sub>PbBr<sub>6</sub> devices reach to (a) 50 and (b) 8  $I_{on}/I_{off}$  ratio with electric field (a) 0.5V/mm and (b) 1 V/mm, respectively.

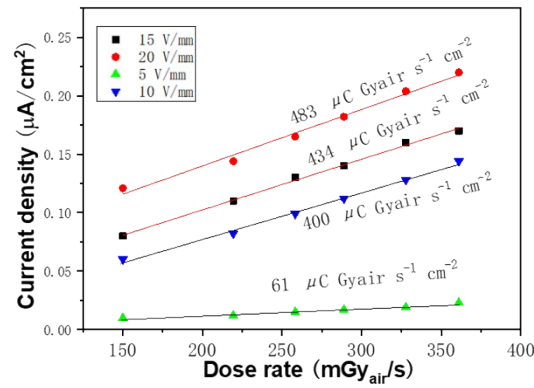

**Figure S8.** A linear dependence for the sensitivity is consistently observed in low-field/low-dose.

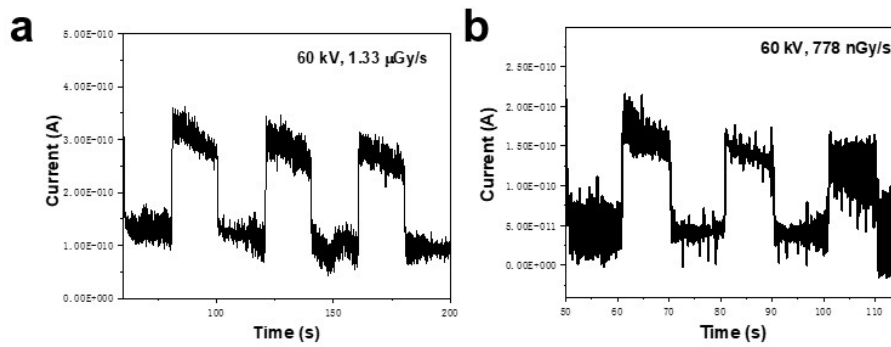

**Figure S9.** X-ray response current of the CsPbBr<sub>3</sub>/Cs<sub>4</sub>PbBr<sub>6</sub> X-ray detector under low-dose X-ray irradiation.

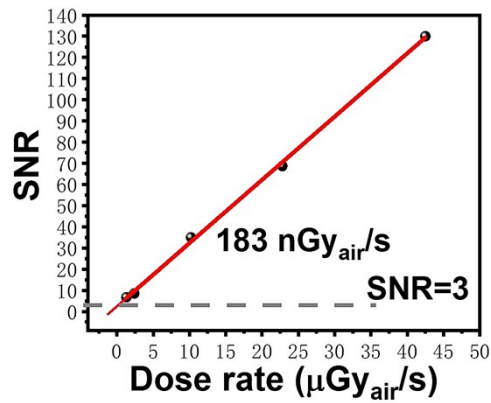

**Figure S10.** SNR of the CsPbBr<sub>3</sub>/Cs<sub>4</sub>PbBr<sub>6</sub> perovskite X-ray detector as a function of X-ray dose rate

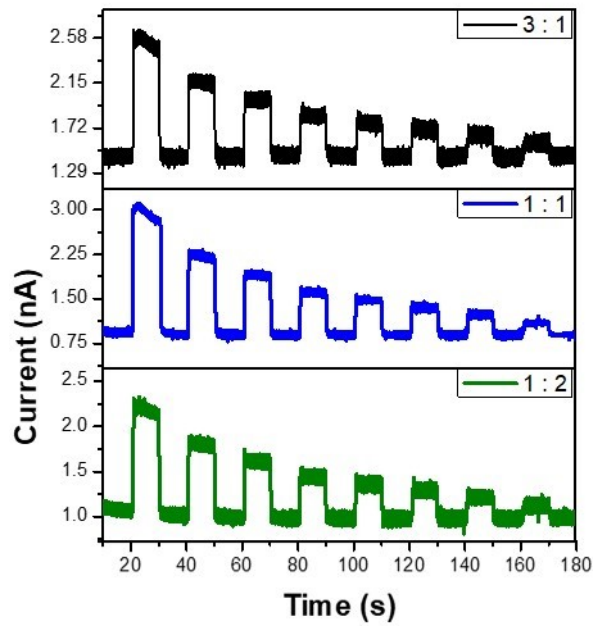

**Figure S11.** X-ray i-t curves of the different devices with heterojunction ratio 1:2, 1:1 and 3:1, respectively. The electric field is  $2 \text{ V mm}^{-1}$

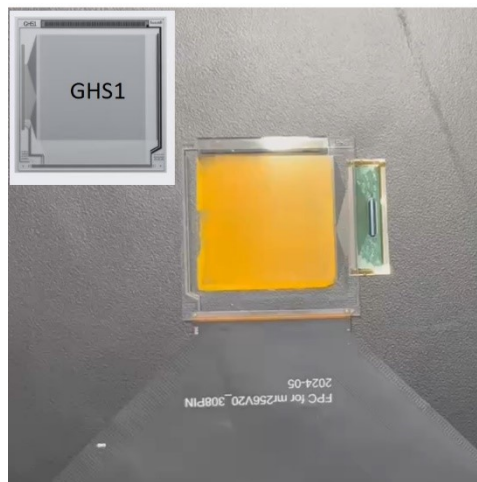

**Figure S12.** Digital photo of integrated  $\text{CsPbBr}_3/\text{Cs}_4\text{PbBr}_6$  FPD after blading the carbon electrode and bonding with a flexible printed circuit (FPC). The orange film is  $\text{CsPbBr}_3/\text{Cs}_4\text{PbBr}_6$  heterojunction (The black carbon electrode is on the backside of the perovskite thick film and is not visible from above figure. The specific device structure can be referred to Figure 3c in the main text). The inset picture is the TFT based backplane (Model: GHS1).

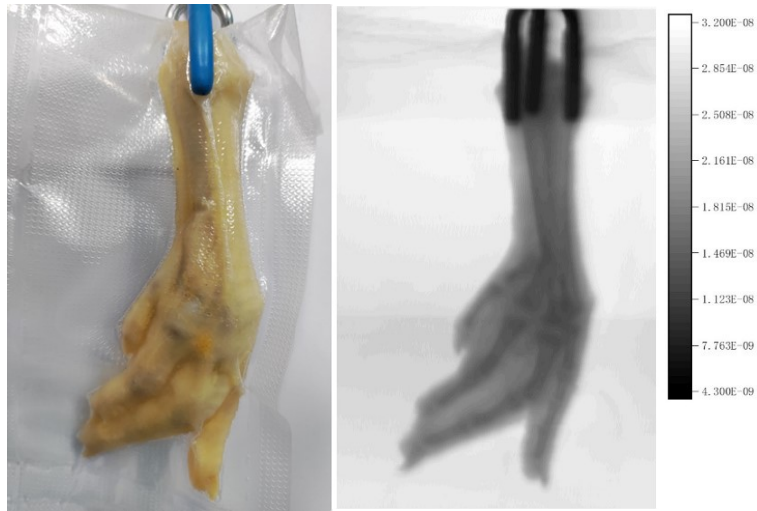

**Figure S13.** The X-ray images obtained with a single-pixel detector ( $1 \times 2 \text{ mm}^2$ ) by scanning the X and Y directions at the dose rates  $185.2 \mu\text{Gy}_{\text{air}} \text{ s}^{-1}$  (total dose:  $1667 \text{ mGy}_{\text{air}}$ , exposure time:  $9000 \text{ s}$ )

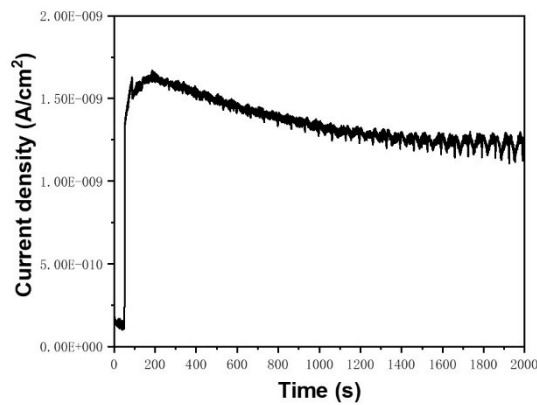

**Figure 14.** Stability of the annealed  $\text{CsPbBr}_3/\text{Cs}_4\text{PbBr}_6$  X-ray detector under continuous X-ray radiation measured at room temperature ( $28 \text{ }^\circ\text{C}$ ) and 50% relative humidity.

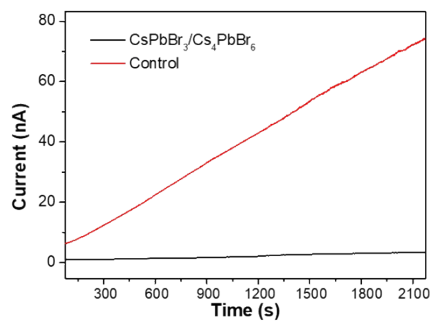

**Figure S15.** The temporal baseline tracking of the perovskite heterojunction and control sample devices at 100 V/mm.

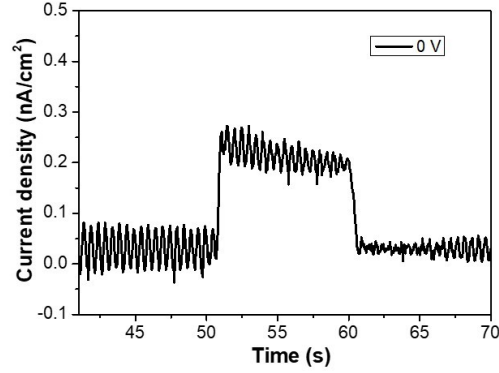

**Figure S16.** X-ray i-t curves (under 0 V/mm electric field) of the devices.

**Table S1.** The effect of precursor control details on film morphology. The reaction temperature refers to the temperature at which the precursor is synthesized in the first step. The impurity content refers to other components in the CsPbBr<sub>3</sub> precursor powder, such as Cs<sub>4</sub>PbBr<sub>6</sub> hetero-phase. The approximate content was estimated by rietveld analysis of XRD diffraction peaks.

| Samples              | Pre-20         | Pre-40         | Pre-60         | Pre-80    |
|----------------------|----------------|----------------|----------------|-----------|
| Reaction Temperature | 20 °C          | 40 °C          | 60 °C          | 80 °C     |
| Impurity Amount      | 10%            | 4%             | 30%            | 80%       |
| Film Morphology      | Heterojunction | Heterojunction | Heterojunction | Compounds |

**Table S2.** Comparison of the device parameters.

| Parameter                                                            | $\alpha$ -Se  | HgI <sub>2</sub> | CdTe      | MAPbI <sub>3</sub>     | This work |
|----------------------------------------------------------------------|---------------|------------------|-----------|------------------------|-----------|
| Sensitivity<br>( $\mu\text{C Gy}^{-1}_{\text{air}} \text{cm}^{-2}$ ) | 20 [1]        | 1600             | 318       | 9300 [3]               | 12910     |
| $\mu\tau$ ( $\text{cm}^{-2} \text{V}^{-1}$ )                         | $10^{-7}$ [2] | $10^{-4}$        | $10^{-2}$ | $2 \times 10^{-4}$ [3] | $10^{-7}$ |

**Table S3.** Performance comparison of similar X-ray detectors reported.

|  | $I_{\text{on}}/I_{\text{off}}$ | ratio | Dark | Sensitivity ( $\mu\text{C}$ ) | $\mu\tau$ | nt ( $\text{cm}^{-2}$ ) | LoD | Refe |
|--|--------------------------------|-------|------|-------------------------------|-----------|-------------------------|-----|------|
|--|--------------------------------|-------|------|-------------------------------|-----------|-------------------------|-----|------|



|                                                               |                                                                              | Current                                      | Gy <sub>air</sub> <sup>-1</sup> cm <sup>-2</sup> ) | product<br>(cm <sup>2</sup> /V) | <sup>3)</sup>             | (nGy <sub>air</sub><br>s <sup>-1</sup> ) | re-<br>e-<br>n-<br>c-<br>e |
|---------------------------------------------------------------|------------------------------------------------------------------------------|----------------------------------------------|----------------------------------------------------|---------------------------------|---------------------------|------------------------------------------|----------------------------|
| Au/CsPbBr <sub>3</sub> /FTO                                   | 3 (N/A)                                                                      | 2.0 * 10 <sup>-7</sup><br>A/cm <sup>2</sup>  | 55684 (5 V/<br>mm)                                 | 5.1 *<br>10 <sup>-3</sup>       | 1.5 *<br>10 <sup>10</sup> | 215                                      | 12                         |
| C/CsPbBr <sub>3</sub> /SnO <sub>2</sub> /FTO                  | 6 (80 V/<br>mm, 686<br>μGy <sub>air</sub> s <sup>-1</sup> )                  | 5.0 * 10 <sup>-6</sup><br>A/cm <sup>2</sup>  | 15891 (80<br>V/ mm);                               | 5.2 *<br>10 <sup>-4</sup>       | 8.4 *<br>10 <sup>10</sup> | 321                                      | 13                         |
| Au/CPB3/CP2B5/Au                                              | 4 (1 V, 204<br>μGy <sub>air</sub> s <sup>-1</sup> )                          | 1.0 * 10 <sup>-8</sup><br>A/ cm <sup>2</sup> | 258000 (25<br>V/ mm);<br>3075 (2 V/<br>mm)         | 3.4 *<br>10 <sup>-3</sup>       | 7.7 *<br>10 <sup>9</sup>  | 128                                      | 14                         |
| Au/Al/BCP/C60/CsPbBr <sub>3</sub> /Au                         | 4 (40V,<br>1.86 μGy <sub>air</sub><br>s <sup>-1</sup> )                      | 1.5 * 10 <sup>-9</sup><br>A/ cm <sup>2</sup> | 73000 (100<br>V/ mm)                               | 2.3 *<br>10 <sup>-3</sup>       | N/A                       | 15                                       | 15                         |
| C/CsPbBr <sub>3</sub> /FTO                                    | 25 (1.6V/<br>mm, 361<br>μGy <sub>air</sub> s <sup>-1</sup> )                 | 2.8 * 10 <sup>-9</sup><br>A/cm <sup>2</sup>  | 42000 (40<br>V/ mm);<br>153 (1.6 V/<br>mm)         | 3.0 *<br>10 <sup>-5</sup>       | 1.5 *<br>10 <sup>13</sup> | 136                                      | 16                         |
| C/CsPbBr <sub>3</sub> /Cs <sub>4</sub> PbBr <sub>6</sub> /FTO | 50 (0.5 V/<br>mm, 361<br>μGy <sub>air</sub> s <sup>-1</sup> ),<br>8 (1V/ mm) | 1 * 10 <sup>-11</sup><br>A/cm <sup>2</sup>   | 12910 (80<br>V/ mm);<br>400 (10<br>V/ mm)          | 6.7 *<br>10 <sup>-7</sup>       | 3.1 *<br>10 <sup>11</sup> | 183                                      | This<br>work               |

**Table S4.** The X-ray detector parameters for heterojunction devices with different ratio.

| Heterojunction ratio | Dark Current (nA/cm <sup>2</sup> ) | Sensitivity (μC Gyair <sup>-1</sup> cm <sup>-2</sup> ) | I <sub>On/Off</sub> ratio |
|----------------------|------------------------------------|--------------------------------------------------------|---------------------------|
| 3:1                  | 1.5                                | 6.7                                                    | 1.5                       |
| 1:1                  | 0.9                                | 12.4                                                   | 2.4                       |
| 1:2                  | 1.0                                | 7.8                                                    | 1.8                       |

#### References:

1. Jinsong Huang, *Sci. Adv.* 2021, **7**, eabg6716.
2. Jinsong Huang, *Nat. Commun.* 2019, **10**, 1066.
3. Sarah Deumel, *Nat. Electron.*, 2011, **4**, 681–688.
4. Jin Jang, *Nanoscale*, 2018, **10**, 8591-8599.
5. Caofeng Pan, *Adv. Optical Mater.* 2023, **11**, 2202428.

6. Lena Yadgarov, *Adv. Energy Sustainability Res.*, **5**: 2300193.
7. Angshuman Nag, *ACS Energy Lett.* 2016, **1**, 4, 665–671.
8. Bo Zou, *Nat. Commun.* 2018, **9**, 4506.
9. Jongnam Park, *Adv. Sci.* 2022, **9**, 2104660.
10. Koushik Biswas, *J. Phys. Chem. Lett.* 2018, **9**, 4, 830–836.
11. Xuhui Sun, *Adv. Funct. Mater.* 2021, **31**, 2105051.
12. J. Tang, *Adv. Mater.* 2019, **31**, 1904405.
13. Y. Ge, *Nat. Comm.*, 2024, **15**:1588.
14. J. Ye, *Adv. Funct. Mater.* 2024, **34**, 2401220.
15. S. Yang, *ACS Appl. Mater. Interfaces* 2023, **15**, 44, 51370–51379.
16. Jian Wang, *Adv. Sci.* 2024, **11**, 2407314.
